# Supplementary material
Source: HighWire-hosted journal article supplement (https://bmjopen.bmj.com/content/7/3/e013198)
Supplement: inline-supplementary-material-1 [file inline-supplementary-material-1.pdf]

## Appendix

**Table 1 Risk factors predispose expectant mothers to ASB including:**

|                           |                                                                                                                                                                                                       |
|---------------------------|-------------------------------------------------------------------------------------------------------------------------------------------------------------------------------------------------------|
| Age                       | The highest rate of ASB was reported in the maternal age of $\geq 35$ years; another study reported in age-group between 21-30 years. <sup>[40]</sup>                                                 |
| Gestational stage         | ASB is more common during the second half of pregnancy. <sup>[10]</sup>                                                                                                                               |
| Multiparity               | high parity leads to the descent of pelvic organs which lead to a widening of the urethral orifice that influences the ascent of the microbes. <sup>[38,39]</sup>                                     |
| Socioeconomic level       | ASB was 2% in non-indigent compared to 6.5% of indigent pregnant women. <sup>[9]</sup>                                                                                                                |
| Sexual activities         | Sexual pressure thrust the bacteria from vagina up to the urethra. <sup>[33]</sup>                                                                                                                    |
| Genital hygiene           | pregnant women find it problematic to clean their anus properly after defecating, the direction of cleaning and drying of the perineum after a bowel movement is another risk factor. <sup>[35]</sup> |
| HIV                       | ASB was (20.4%) in HIV-positive cases compared with (3%) in HIVnegative patients. <sup>[28]</sup>                                                                                                     |
| Race-related demographics | ASB was 10% in Iran and 1.7 % in Saudi Arabia. <sup>[7]</sup> These may be because of different personal hygiene, sexual practices, and clothing.                                                     |
| Other factors             | anatomical anomalies, sickle cell anaemia, DM and body mass index. <sup>[52,54]</sup>                                                                                                                 |

Figure 1: Questionnaire

**Questionnaire of Asymptomatic bacteriuria in pregnancy**

Patient Name: \_\_\_\_\_ Age: \_\_\_\_\_ Occupation: \_\_\_\_\_ Religion: \_\_\_\_\_  
 Contact details: \_\_\_\_\_

**OBSTETRIC HISTORY:**

#Pregnancies: \_\_\_\_\_ # Deliveries: \_\_\_\_\_ #Gestational Age  
 #History of contraceptives: \_\_\_\_\_ #Type: \_\_\_\_\_ #Duration: \_\_\_\_\_

**PAST OR CURRENT MEDICAL PROBLEMS**

| Please check one                                        | Yes | No |
|---------------------------------------------------------|-----|----|
| History of previous UTI                                 |     |    |
| 1-Diagnosed by: _____ 2-Treated with: _____             |     |    |
| History of antibiotic therapy within the last two weeks |     |    |
| C/O dysuria, frequency and urgency                      |     |    |
| C/O pyrexia of unknown origin                           |     |    |
| History of congenital anomalies of the urinary tract.   |     |    |
| History of hypertension                                 |     |    |
| History of DM                                           |     |    |
| kidney or bladder disease                               |     |    |

**SOCIAL HISTORY :**

Highest level of education: ☐ Elementary ☐ Junior High ☐ High School ☐ College ☐ Graduate School

Have you ever smoked? Yes ☐ No ☐ | Current smoker ☐ | Quit (month/year): \_\_\_\_\_

1. The socioeconomic level: \_\_\_\_\_

2. Personal Hygiene:

- The regularity of bathing and changing of underwear: \_\_\_\_\_
- The direction of washing the genital region after urination: \_\_\_\_\_

**INFECTION SCREENING :**

|                                 | Yes                      | No                       |
|---------------------------------|--------------------------|--------------------------|
| 1. Sexually transmitted disease | <input type="checkbox"/> | <input type="checkbox"/> |
| 2. HIV                          | <input type="checkbox"/> | <input type="checkbox"/> |

**MEDICATIONS:** (prescription medications, birth control, aspirin, vitamins/herbals, supplements) Everything since your last period):

| Medication | Dose (mg.) | Times per day | Medication | Dose (mg.) | Times per day |
|------------|------------|---------------|------------|------------|---------------|
| 1. _____   |            |               | 2. _____   |            |               |

Other Medical Problems: \_\_\_\_\_

Details of positive responses: \_\_\_\_\_

**Other risk factors:**

1. Frequency of sexual intercourses per week: \_\_\_\_\_

2. The regularity of antenatal visits to gynecologist: \_\_\_\_\_

Patient Signature: \_\_\_\_\_ Date: \_\_\_\_\_

**Figure 2:** Flow diagram of Selection of Study Subjects

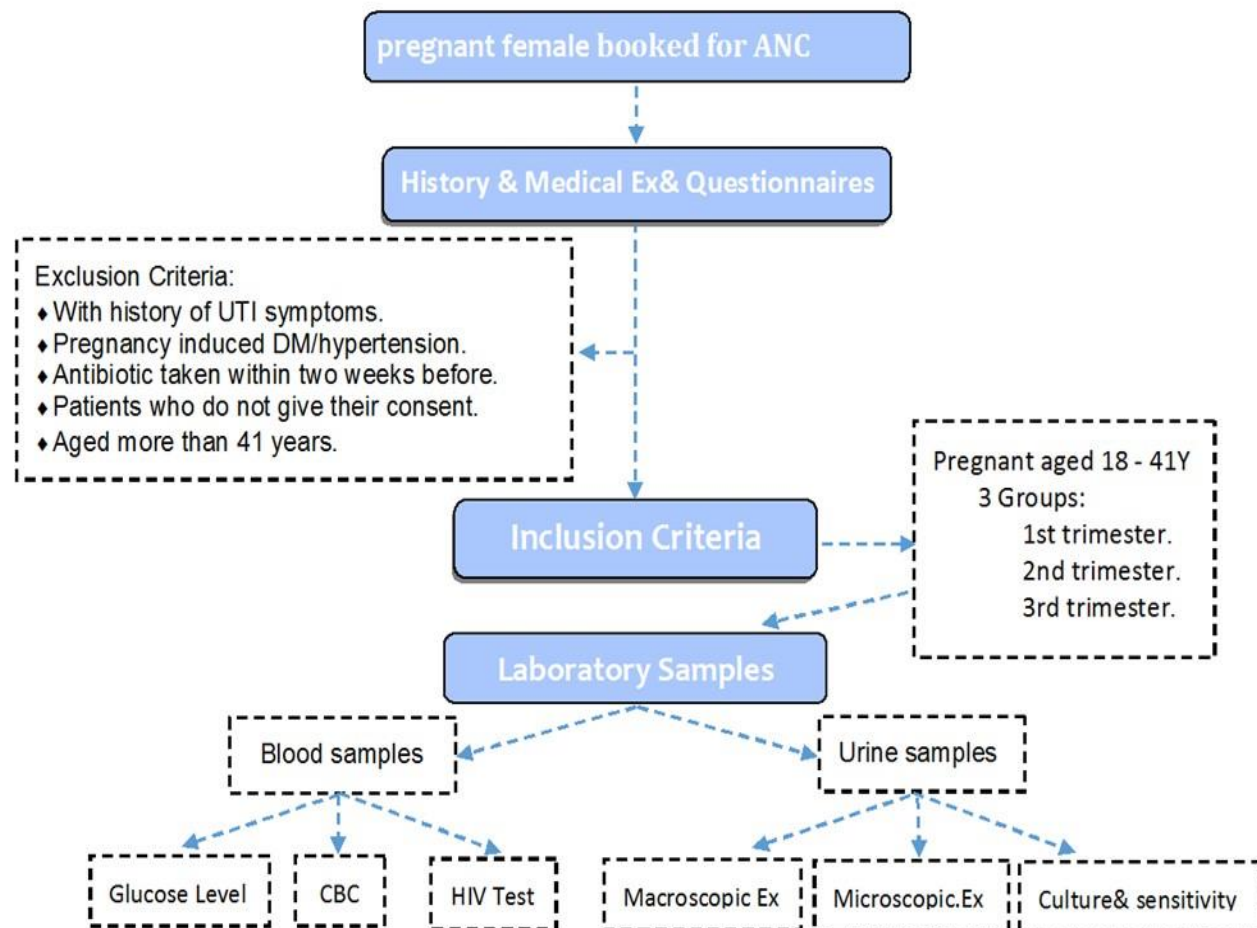

### Figure 3 Sample Size selection

Sample Size:

Sample size was determined using the formula: 
$$N = \frac{z^2 pq}{d^2}$$

|                             |                                                                                                                              |
|-----------------------------|------------------------------------------------------------------------------------------------------------------------------|
| <b>"Z"</b>                  | Standard deviate by CL= 95% for normal distribution.<br>95% – Z-Score = <b>1.96</b>                                          |
| <b>" p "</b>                | Expected proportions in populations based on previous studies<br>prevalence of <b>7.8%</b> obtained from a similar study     |
| <b>" q "</b>                | absolute error or precision<br>q = 1 – p = <b>0.92</b>                                                                       |
| <b>"d "</b>                 | degree of precision of the estimate = <b>0.05</b> .                                                                          |
| <b>" N "</b><br>sample size | $\frac{1.96^2 \times 0.078 \times 0.92}{0.05^2} = \frac{3.84 \times 0.078 \times 0.92}{0.0025} = \mathbf{110 \text{ cases}}$ |

**Figure 4: The hospital's ethical committee informed consent**

Al-Azhar University  
Faculty of Medicine  
Medical Research Ethics Committee

**Investigator Application Form**

**Title of the research**

"Prevalence of Asymptomatic bacteriuria among pregnant females attending gynecology and obstetrics clinic of El Hussein and Sayed Galal Hospitals of Al-Azhar University in Egypt"

**Name of principle investigator**

Mohamed Abdel Aziz Abdel Moneim Elzayat

**Department**

Department of Public Health (International Master of Public Health).

**Affiliation of the Principle Investigator**

Public Health center, School of Medicine, Tsinghua University - China

**Phone Number of the Principle Investigator**

+20 1063503330 (Egypt). +86 13051325262 (China). Email: mud15@mails.tsinghua.edu.cn

**Name (s) of the Supervisors / Co- investigator (s)**

**Prof. Feng Cheng**

Global Health Program Director & CASSH President

Research Center for Public Health, School of Medicine, Tsinghua University, Beijing 100084, China

Tel: +8610 62794936 Fax: +8610 62794536

**Grade of the Study:**

International Master of Public Health (IMPH) in School of Medicine, Tsinghua University.

**Type of research:**

**Thesis :** Cross sectional study combining the use of questionnaires and laboratory analysis of samples.

**Subjects of research:**

All pregnant female attending Ante Natal Care(ANC) clinic of El Hussein and Sayed Galal Hospitals of Al-Azhar University in Cairo-Egypt

**List the risks of the study:** No risks

**List the potential benefits to the subjects:**

The participant will be screened for asymptomatic bacteriuria and if you are positive you will receive the treatment to prevent the complications on mother and infant.

**The research is for the good of society:** YES If yes, specify:

- Superior attention to the pregnant women is one of the most central points in health care. One of the harms during pregnancy is asymptomatic bacteriuria. Therefore, it is imperative to determine the prevalence of ASB to address this serious condition during pregnancy.
- There is a much higher risk (up to 40%) of progression of asymptomatic bacteriuria to pyelonephritis at the late pregnancy which has been associated with many perinatal complications including hypertension, respiratory insufficiency, renal disease and bacteremia. Also, it has been associated with preterm delivery; Preterm labor is the main cause of the neonatal mortality and morbidity worldwide, While the interventions of screening and early antimicrobial treatment will improve these outcomes, prevent pyelonephritis and avoid up to 20% of preterm deliveries.
- Few studies have been published in asymptomatic bacteriuria and available data are scanty.
- **Facilities for The Research Are Available in Your Department:**
  1. library resources.
  2. photocopying facilities.
  3. Statistical software and graphics packages, electronic mail and internet access.

**Funding/Support and role of the sponsor:**

There is no funding from Tsinghua or Al-Azhar Universities.

**Attachments:**

Informed consent form:

Protocol

Signature of Principle Investigator

كلية طب القاهرة  
لجنة أخلاقيات البحث العلمي  
Prof. M. Elzayat  
Date 26/11/2016



جامعة الأزهر  
كلية الطب  
لجنة أخلاقيات البحوث الطبية

نموذج الموافقة المستنيرة لأجراء بحث طبي على مشاركون متطوع

عنوان البحث

"تقييم انتشار الجرثومية عديمة الأعراض بين الإناث الحوامل اللاتي يترددن عيادة أمراض النساء والتوليد في مستشفى الحسين والسيد جلال إحدى مستشفيات جامعة الأزهر - القاهرة - مصر".

أنت مدعوة للمشاركة في بحث علمي سريري يجري في جامعة الأزهر. الرجاء أن تأخذ (ي) الوقت الكافي لقراءة المعلومات التالية بشأن قبل أن تقرر (ي) إذا كنت تريد (ين) المشاركة أم لا. بإمكانك طلب إيضاحات أو معلومات إضافية عن أي شيء مذكور في هذه الإستمارة أو عن هذه الدراسة ككل من طبيبك. علما بأنك لن تتحمل أى تكاليف.

الاسم :

النوع :

السن :

الرقم القومى :

المكان الذي سوف تتم فيه الدراسة: عيادة أمراض النساء والتوليد و المعامل الرئيسية بمستشفى الحسين والسيد جلال إحدى مستشفيات جامعة الأزهر - القاهرة - مصر  
الخلافة العلمية و الهدف من إجراء البحث :

أحد الأهداف الرئيسية للصحة الطب العام هو "الأمنومة الأمنة"، وعلاوة على ذلك لمنع "إهدار الحمل"، لذلك، لا بد من تحديد مدى انتشار الجرثومية عديمة الأعراض بين الإناث الحوامل اللاتي يترددن عيادة أمراض النساء والتوليد في مستشفى الحسين والسيد جلال إحدى مستشفيات جامعة الأزهر - القاهرة - مصر". للحصول على الرعاية السابقة للولادة و التعرف على الكائنات الحية المسببة وإيهم الأكثر شيوعا وكذلك نسبة البكتيريا المعزولة.

الفوائد المتوقعة من البحث :

1. تقييم انتشار "البيلة الجرثومية في بلدي.
2. فهم عوامل الخطر المرتبطة بالبيلة الجرثومية.
3. تحديد البكتيريا الأكثر شيوعاً التي تسبب البيلة الجرثومية والنسب المئوية لأنواع مختلفة من هذه البكتيريا.
4. تقديم توصيات تحسين ممارسة أمراض النساء والتوليد في التشخيص وتحديد الدواء المفضل لعلاج البيلة وفقاً لنتائج ثقافة وحساسية.

المخاطر المحتملة حدوثها من إجراء البحث :

لا توجد أى مخاطر

البدائل المتاحة :

سرية المعلومات : سوف تعامل معلوماتك بسرية كاملة و لن يطلع على بياناتك سوى الباحث الرئيسي  
حقوق المشاركة : من حقه الامتناع عن المشاركة في هذا البحث وفى هذه الحالة ستلقى علاجك المعتاد و أيضا : من حقه الانسحاب من المشاركة فى هذه الدراسة فى أى وقت دون ابداء أسباب و لن يكون عليك أية عواقب سلبية و بدون أن تطالب أو تتحمل أى تكاليف و سوف يتم إخبارك بأى معلومات جديدة قد تظهر خلال البحث والتي يمكن أن تؤثر على الاستمرار فى الدراسة.

عند وجود أى استفسار لديك يمكنك الاتصال ب:

٠١٠٦٢٥٠٢٢٢٠

تليفون :

٠١٠٠٥١٠٢٩٦٤

تليفون :

اسم الباحث الرئيسي : د. عبد العزيز عبد المنعم محمد الزيات

مقرر لجنة الأخلاقيات : د. محمد عبد المنعم محمد الزيات

إقرار الباحث:

لقد أطلعت بالتفصيل على التعهد بالإشتراك في البحث مع (اسم المريض، مثله القانوني)، وأفهمت المريض الغاية من هذه الدراسة ومن أخطارها وفوائدها. لقد أجبت المشترك على جميع الأسئلة التي تقدم بها بوضوح تلم وتعهدت له بإعلامه عن أي تغيير يطرأ في موضوع هذا البحث.

اسم الباحث : د. عبد المنعم محمد الزيات

التوقيع

إقرار المريض بالمشاركة في البحث:

أنا الموقع أدناه وبعد أن أطلعت واستوعبت كل جوانب هذا البحث وأجبت عن كل أسئلتي أوافق بملئ إرادتي على المشاركة في هذه الدراسة وأنا على علم تام بأنني أستطيع الاتصال بالدكتور  
على الرقم  
وذلك إذا أردت توجيه أي سؤال، كما أنني أعلم أنه فيما لو أن أسئلتي لم يجاب عليها بطريقة مقنعة يمكنني الاتصال بأحد أعضاء لجنة الأخلاقيات الدكتور على الرقم . كما إنني أعلم أنه يمكنني الانسحاب من المشاركة في هذه الدراسة في أي وقت شئت حتى بعد التوقيع على هذه الوثيقة وإن العناية التي ألقاها لن تتأثر بهذا الانسحاب وإنني سوف أزود بنسخة عن هذه الوثيقة.

اسم المريض أو مثله القانوني/قريبه أو وصيه:

التوقيع أو البصمة:

الرقم القومى:

التاريخ:

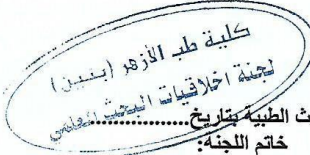

خاتم اللجنة:

٠١٠٠٥١٠٢٩٦٤
